# Supplementary material for: Novel joint catalytic properties of Fe and N co-doped graphene for CO oxidation
Source: Royal Society of Chemistry journal article supplement (doi:10.1039/d0cp05683a), 2020-01-01
Supplement: d0cp05683a1.pdf [file d0cp05683a1.pdf]

## Supplementary Information

### Novel joint catalytic properties of Fe and N co-doped graphene for CO oxidation

Hongbo Wang,<sup>\*a</sup> Jinxiang Liu,<sup>a</sup> Jinghua Guo,<sup>a</sup> Xuedong Ou,<sup>b</sup> Xike Wang,<sup>c</sup> and Gang Chen<sup>\*ad</sup>

<sup>a</sup>Laboratory of Advanced Materials Physics and Nanodevices, School of Physics and Technology, University of Jinan, Jinan, Shandong 250022, China.

<sup>b</sup>Science and Technology on Reliability and Environmental Engineering Laboratory, Beijing Institute of Spacecraft Environment Engineering, Beijing, 100094, China.

<sup>c</sup>Zibo Vocational Institute, Zibo, Shandong, 255314, China.

<sup>d</sup>School of Physics and Electronics, Shandong Normal University, Jinan, Shandong 250358, China.

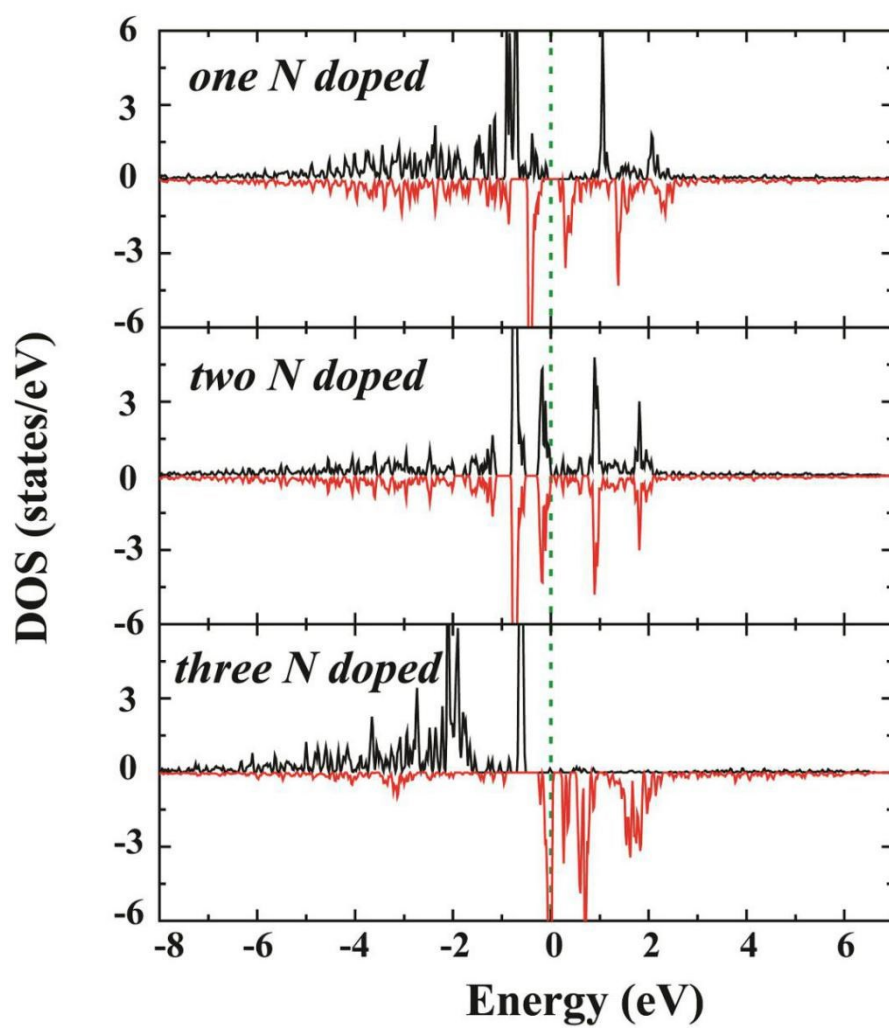

Fig. S1 *d* orbitals of Fe atom for one, two and three N doping at the situations without O<sub>2</sub> molecule adsorbed, respectively.

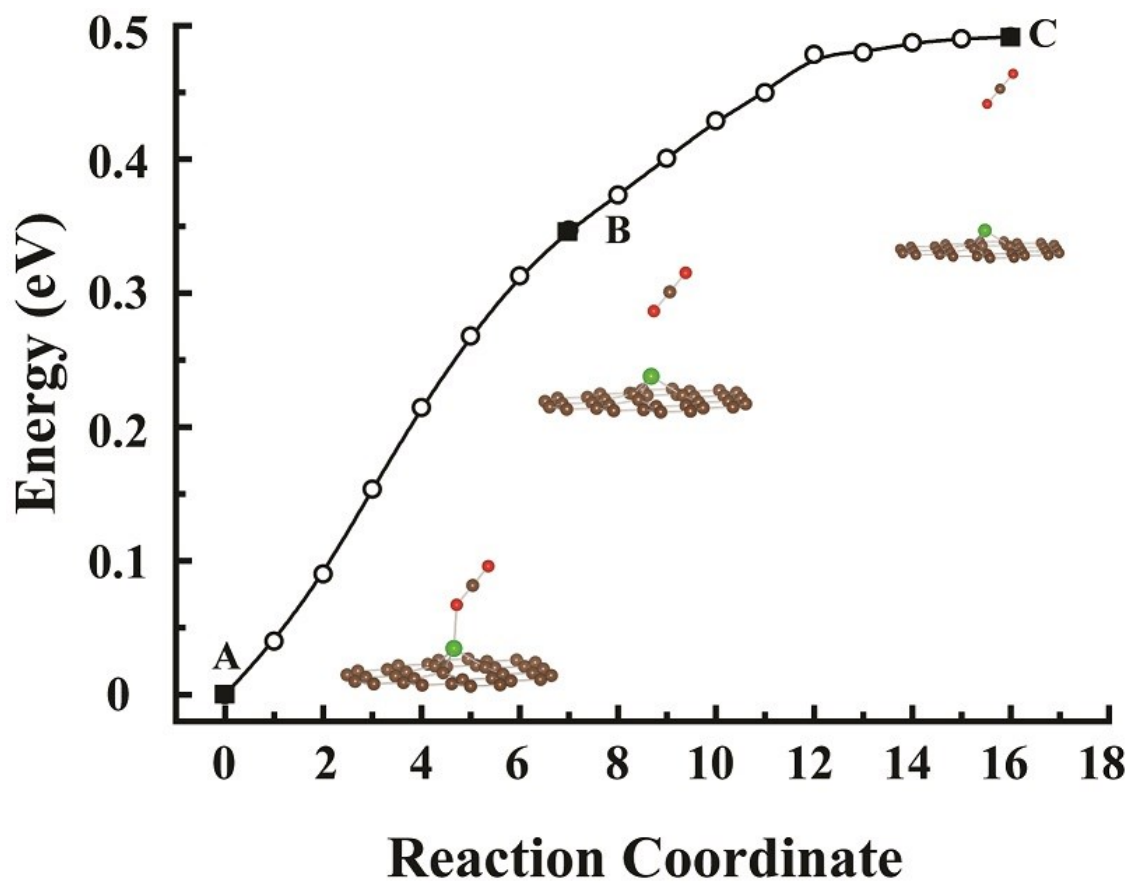

Fig. S2 The energy path of CO<sub>2</sub> molecule leaving from the substrate.

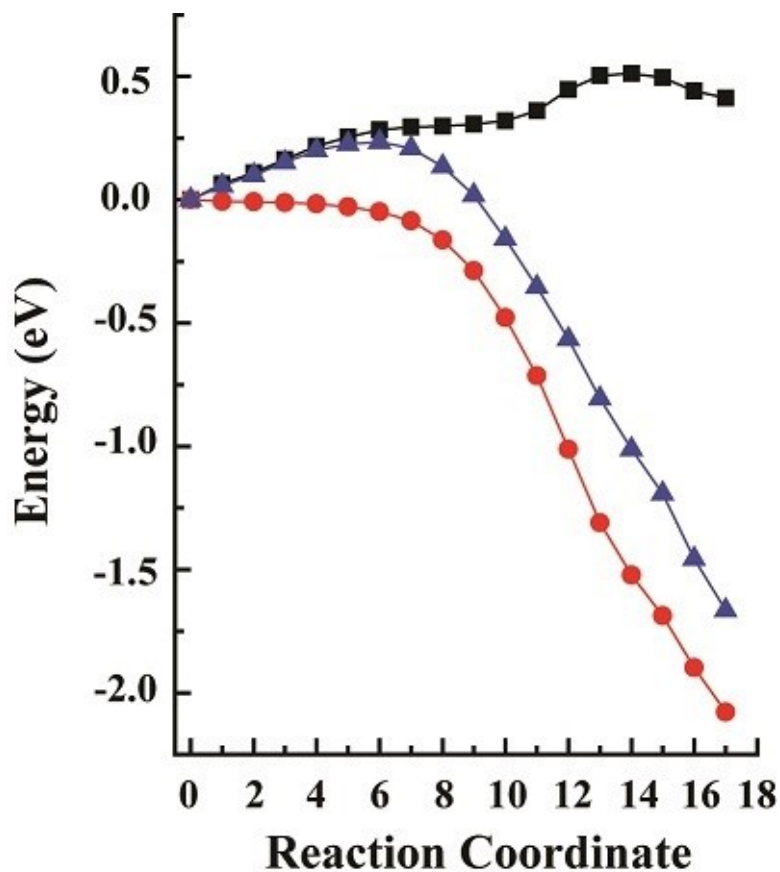

Fig. S3 Then energy curves of  $CO_2$  molecule and  $O_2$  molecule in the Fig. 8 (a) reactive process, respectively. The black line stands for the energy increase ( $E_{CO_2}$ ) in the  $CO_2$  molecule released process, and the red line stands for the energy decrease ( $E_{O_2}$ ) in the  $O_2$  molecule adsorbed process. In the calculations, we used the relative positional configurations of  $CO_2$  and  $O_2$  molecule in Fig. 8(a) reactive process. The blue line is the total energy, which can be defined as  $\Delta E = E_{CO_2} + E_{O_2}$ . We can find that the total energy have a same trend with the energy path in Fig. 8(a) reactive process.

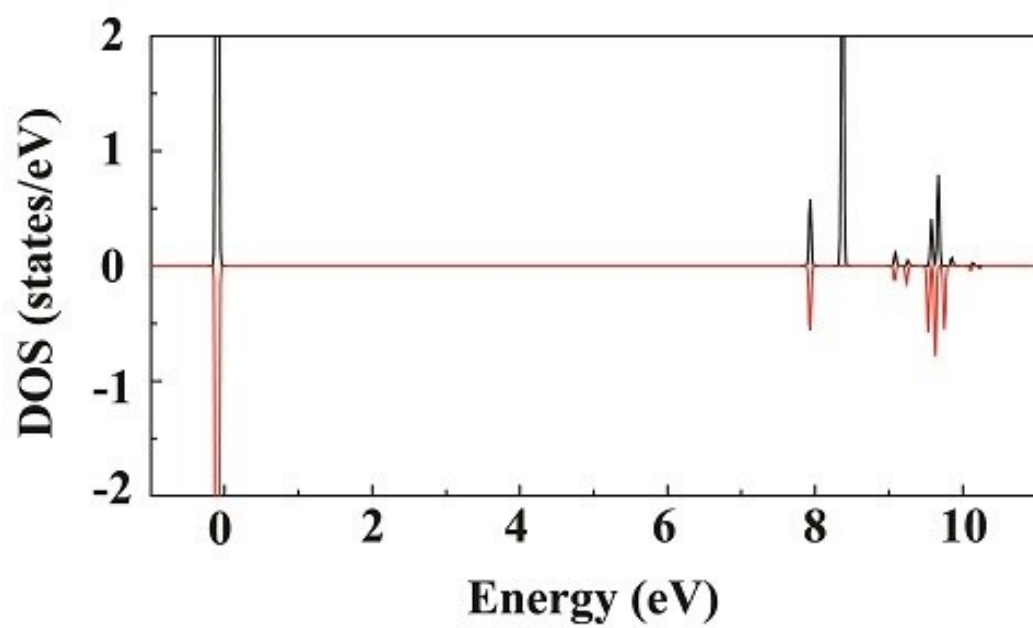

Fig. S4 The  $2p$  orbitals of the O atom in the isolated CO<sub>2</sub> molecule.
